# Supplementary material for: Uncertainty in flood frequency analysis of hydrodynamic model simulations
Source: Copernicus journal article supplement (doi:10.5194/nhess-2020-272), 2020-08-26
Supplement: Supplementary file [file nhess-2020-272-AC2-supplement.pdf]

## Replies to Referee #2

We are grateful for all the comments. In this discussion forum, we will briefly reply to the comments point by point. The detailed revisions will be shown in our manuscript and the final replies to reviewers.

### General comments

This paper is based on large scale hydrologic-hydrodynamic simulations to investigate different sources of uncertainty in flood risk estimation, with the use of flood frequency analysis tools. The chosen topic deserves some interest, though the analysis is based on a specific configuration of a set of available hydrological model output (from the Earth2Observe project) and an in-house hydrodynamic model (CaMa). However, the focus on the global domain makes it of larger interest for a wider community.

- Among the main limitations of the manuscript is the sub-optimal use of the English language, including both terminology, grammar, typos and structure of the sentences, which makes it hard to read and at times hampers the understanding of the content. I strongly suggest to work and improve it with the help of a native speaker.

Re: Thanks for the suggestion. We will seek help from native speakers or English editing company to improve the English.

- Another important comment is related to the general framing of the analysis. In the current version a number of analyses are performed, focusing on different aspects, though in my opinion it lacks a consistent storyline and some reasoning behind why they were made and clear statements about what we learn following their results.

Re: Yes, we do realize that we have included too much analysis from different aspects. In the revised manuscript, we will delete some of them and concentrate on the sensitivity analysis to various model inputs, distributions and the variable selected. Analysis will be conducted from pixel level to basins and to the global scale.

- The manuscript is too long compared to the information content it brings. I suggest shortening following the comments below. A number of figures should be removed, improved or put in the supplement material, for the reasons I explain below in the specific comments. In particular, I'm speaking about Figures 4 and 5 wrt the issues with fitting analytical functions with different degrees of freedom (comment #10), Fig. 6 (comment #18), Fig. 10, 12, and 14 (comments #24, #27, #29)

Re: Thanks, we will shorten the manuscript by considering your comments and comments from the other reviewer. For example, we can combine Figure 4 and Figure 5, delete Figure 6 and Figure 12 since they are not relevant with the sensitivity analysis. We can also delete Figure 10 since it doesn't show enough information. Figure 14 can be improved to show more details in specific zooming regions.

### Specific comments

1. p2, l8-9: acronyms should be defined with "full name (acronym)", e.g., Global Runoff Data Centre (GRDC). Same for p3, l5 and l26.

2. p2, 114: Pearson type III
3. p3, 11: suggested “connected” → “analyzed the relation between ...”
4. p3, 13-5: Sentence not clear. Please rephrase.
5. P4, 13: please define the acronym SAR
6. p4, 110: “various runoff inputs” is too general. Please add details here or a reference to the details included in Sect. 2.2 wrt the inputs used.
7. P4, 113: I suggest adding an introductory sentence here to give more details about the experiment itself, before jumping to the uncertainties to investigate.
8. P4, 114-16: please improve this part. Also, I find the variable names V1\_(rivdph) and V2\_(sto2dph) not very intuitive. Why not simply calling them depth and storage? Especially sto2dph creates confusion on whether it is a storage or a depth.
9. Table 1: I suggest removing “Various” in the caption.

Re to 1-9: Thanks, we will correct the errors and improve the sentences which have been pointed out above.

10. P5, 112: Note that the Gumbel and the Gamma distributions have 2 parameters. In fact, results in Figure 5 seems to me the natural consequence of fitting a series of points with mathematical functions with different degrees of freedom, where the 5 parameter distribution is able to fit the data more skillfully (though it doesn't mean it will be more skillful in predictive mode for future floods), Then the 3 parameter distributions and the 2-parameter Gamma and Gumbel as the least skillful. One would obtain similar results when fitting the series of data with polynomials of grade 5,3 and 2, because higher grade polynomials can fit better the input data.

Re: Thanks. The degree of freedom is the cause for the diversities of final results using different fitting distributions. We will add this explanation to the revised manuscript.

11. P5, 113: I suggest renaming this section (e.g., “Fitting performance” or similar)
12. p5, 115: calculated
13. p5, 119-20: This should be expressed more clearly. E.g:” Smaller aic denote higher fitting perfor- mance” or similar, which is actually better written in p6, 123-24
14. p6, 124-26: Use active rather than passive form (e.g., “we compare”)

Re: We will revise the above and finally the manuscript will be sent for professional English correction.

15. p7, 16-7: Is the normalization the real reason? Also, I suggest giving more details on how to weigh the aic values. What is the optimum? What are normally considered good or bad values? It is not intuitive for those who have never used it.

Re: We will give more information of AIC in the Methods. AIC is especially suitable for evaluating model performance with a narrow value range (e.g., 0-1 in this study), because it enlarges the difference by logarithm.

16. P8, 18: “The later peak” –> “the latter”

Re: ok.

17. Figure 3: Interesting to see how the pdfs of gamma and gumbel have similar peaks to the other distributions only for the storage, but not for the river depth. Indeed it is clearly visible also in Fig. 3c. Would be interesting to investigate and motivate the reasons. Now it is only mentioned but no justification is given.

Re: Thanks. This could be an interesting point. We will explore the reasons and add it to the revised manuscript.

18. Figure 6: How does this analysis relate to the FFA and to the rest of the paper in general? I'm not sure of the value of these maps, given the little information the readers have on the 7 runoff inputs, and also because there is no clear pattern identified. Perhaps the main information one can obtain is that anu and univu tends to be on the lower side, while cnrs and univk on the higher side. Yet, this doesn't say anything about the skills of these estimates, which would imply validation with gauge data at a number of stations.

Re: We decided to remove this subsection (and Figure 6) because it is not very relevant to the rest of the paper.

19. P13, 12: after –> downstream

Re: ok.

20. Note that Figure 8 is referenced before Figure 7

Re: Thanks, we will correct this in the revised manuscript.

21. Sect 4.1 refers to return periods in Fig.7, hence in Fig.7 I advise to show return periods in place of frequencies. In any case, to be correct you should refer to those as annual frequencies of occurrence, to avoid confusion. Also, in Figure 7c, why not all distributions are shown?

Re: Thanks. We will revise the x-axis label and ticks. We didn't show the results from Gamma and Gumbel because the fitting performance for these two fitting distributions are the lowest among all the six distributions. We will add them in the revised manuscript.

22. P14, 12: please give some details and possibly a reference on the downscaling procedure.

Re: Ok, the downscaling procedure will be added to the Methods.

23. P14, 13-6: To aid the assessment of water depths I suggest showing in Fig.8 a map or contour of the permanent water bodies. Clearly it is normal to have higher water depths in rivers and lakes, compared to areas normally dry. Also, I cannot find information about the terrain model, in particular whether it represents the river bed or some reference water level. This is important for this analysis.

Re: Thanks. We use Multi-Error-Removed Improved-Terrain DEM (MERIT DEM) as the terrain model. We will also prepare a map for permanent water bodies and added to Figure 8.

24. Figure 10: results shown in this figure are rather obvious. I suggest removing this figure as it brings little information. Over large inundation depths it is normal to have good agreement on whether there's inundation or not, as having poor agreement would mean huge differences in the results of the model used (hence very poor skills for some models).

Re: Thanks, this Figure will be removed.

25. P17, 111: return periods should not be expressed as percentage

Re: Thanks. We will correct it.

26. p18, 110 and Figure 12: Is this the mean inundation of the 7 models? Clarify

Re: They are the mean values among all different experiments, with different runoff inputs, fitting distributions and two selected variables. We will clarify this in the revised manuscript.

27. I find the analysis in Figure 12 of limited use, being a qualitative visual comparison with two other publicly available maps, but also resulting from modeling exercise with limited calibration. Similarly, the comments in p19, 114-18 are partly speculative. More rigorous validation with observed flooded areas would give much more strength to the paper.

Re: Thanks, the comparison of CaMa-Flood result to the other two sources (Figure 12 and subsection 4.5) will be removed in the revised manuscript.

28. P 21,16: for flood impact assessment it is more interesting to know (even smaller) inundation depths in areas where people live or where economic assets are, rather than the inundation in the main channels, which has fewer fields of application.

Re: Yes, the population exposure or GDP exposure to floods is one of key interests in flood damage assessment. We will think about whether we add these assessments in our updates.

29. Figure 14 is unreadable and of limited use in the present form. It is impossible to get enough spatial details of a global inundation map at such small scales. Furthermore, the left and right column are almost indistinguishable. I suggest removing this figure and rather put it in the supplement, together with a number of inset panels zooming into some areas, especially those where the authors want to comment the results.

Re: Thanks, we will think about how to better present the results with this global Figure. And zooming panels can be added if we want to discuss on some regions.

30. Figure 15: What do you mean by the third (and fourth) row and the second row, in the caption? Is it related to the rows of Figure 14? If so it should be clearly stated.

Re: Yes. The captions links Figure 14. We will clarify this in the revised manuscript.

31. P23, 114-15: To be improved

Re: OK.

32. p24, 116: this is a model result for just one point in the entire world, hence it is completely irrelevant. Even more when looking at figure 6. Also (see lines 20-22), being in the middle of the 7 outputs doesn't mean it is more skillful. Validation with observed data is recommended.

Re: Yes, we also mentioned that the point analysis for only one point is not relevant. As reviewer #1 mentioned, we can try to analyze the point values but for all global grids. This will help to find the general results for the global scale. We can validate our model discharge with GRDC observations. This will be added to the supporting information.
